# Supplementary material
Source: MDPI journal article supplement (https://www.mdpi.com/2571-9408/6/3/163)
Supplement: s1 [file s1]

| Object                                              | Sample | Fabric |                                                        | Calcite crystals<br>boundaries | M.G.S.<br>(mm) | Accessory minerals |               |          |         |                    |         |             | $d^{18}O$ | $d^{13}C$ | Most probable<br>origin              |
|-----------------------------------------------------|--------|--------|--------------------------------------------------------|--------------------------------|----------------|--------------------|---------------|----------|---------|--------------------|---------|-------------|-----------|-----------|--------------------------------------|
|                                                     |        |        |                                                        |                                |                | Quartz             | K-mica        | Graphite | Apatite | Opaque<br>minerals | Epidote | Plagioclase |           |           |                                      |
| Triangular lintel<br>with dedicatory<br>inscription | SG_24  | E      | Concrete-like                                          | Sutured/ embayed               | 3.27           |                    | +<br>Ph<br>l? | ++       | ±       | +/-                | ±       |             | -2.89     | 1.40      | Marmara Isl.<br>Saraylar<br>(Turkey) |
| Fragment of chancel<br>screen panel                 | SG_25  | E      | Concrete-like with<br>slightly deformed<br>crystals    | Sutured                        | 2.02           |                    |               | ++<br>+  | +       | ++<br>(Py,<br>Hem) |         |             | -8.74     | 2.71      | Marmara Isl.<br>Camlik (Turkey)      |
| Fragment of slab<br>with portrait                   | SG_27  | E      | Concrete-like/mosaic                                   | Sutured±embayed                | 3.25           |                    |               | +        |         | ±                  |         |             | -1.91     | 2.93      | Marmara Isl.<br>Saraylar<br>(Turkey) |
| Chancel screen panel                                | SG_28  | E      | Calcestruzzo                                           | Sutured                        | 2.06           |                    |               | ++       |         | ±                  |         |             | -3.15     | 2.64      | Marmara Isl.<br>Saraylar<br>(Turkey) |
| Pier                                                | SG_30  | E      | Calcestruzzo con<br>cristalli leggermente<br>deformati | Sutured/ embayed               | 2.10           |                    |               | ++       | ±       | ±<br>(Hem)         |         |             | -3.09     | 2.81      | Marmara Isl.<br>Saraylar<br>(Turkey) |
| Pier-colonnette                                     | SG_35  | E      | Concrete-like                                          | Sutured/ embayed               | 1.77           | ±                  | ±             | ++       |         |                    |         |             | -3.66     | 2.77      | Marmara Isl.<br>Saraylar<br>(Turkey) |
| Fragment of<br>pier-colonnette                      | SG_39  | E      | Concrete-like with<br>slightly deformed<br>crystals    | Sutured                        | 2.05           |                    |               | ++<br>+  | +       | ++<br>(Py,<br>Hem) |         |             | -2.84     | 3.10      | Marmara Isl.<br>Saraylar<br>(Turkey) |
| Triangular slab                                     | SG_53  | E      | Concrete-like                                          | Sutured/ embayed               | 3.44           |                    |               | ++       | ±       | +/-                | ±       |             | -0.52     | 2.46      | Marmara Isl.<br>Saraylar<br>(Turkey) |
